# Supplementary material for: Large-scale molecular dynamics simulations of negative thermal expansion in Bi1-x Lax CoO3 using a pretrained machine learning force field
Source: Research Square preprint supplement (doi:10.21203/rs.3.rs-8425406/v1), 2025-12-26
Supplement: Supplementary file 1 [file 1c53079e84ca1630413af0d0.docx]

### **Supplementary Information**

###
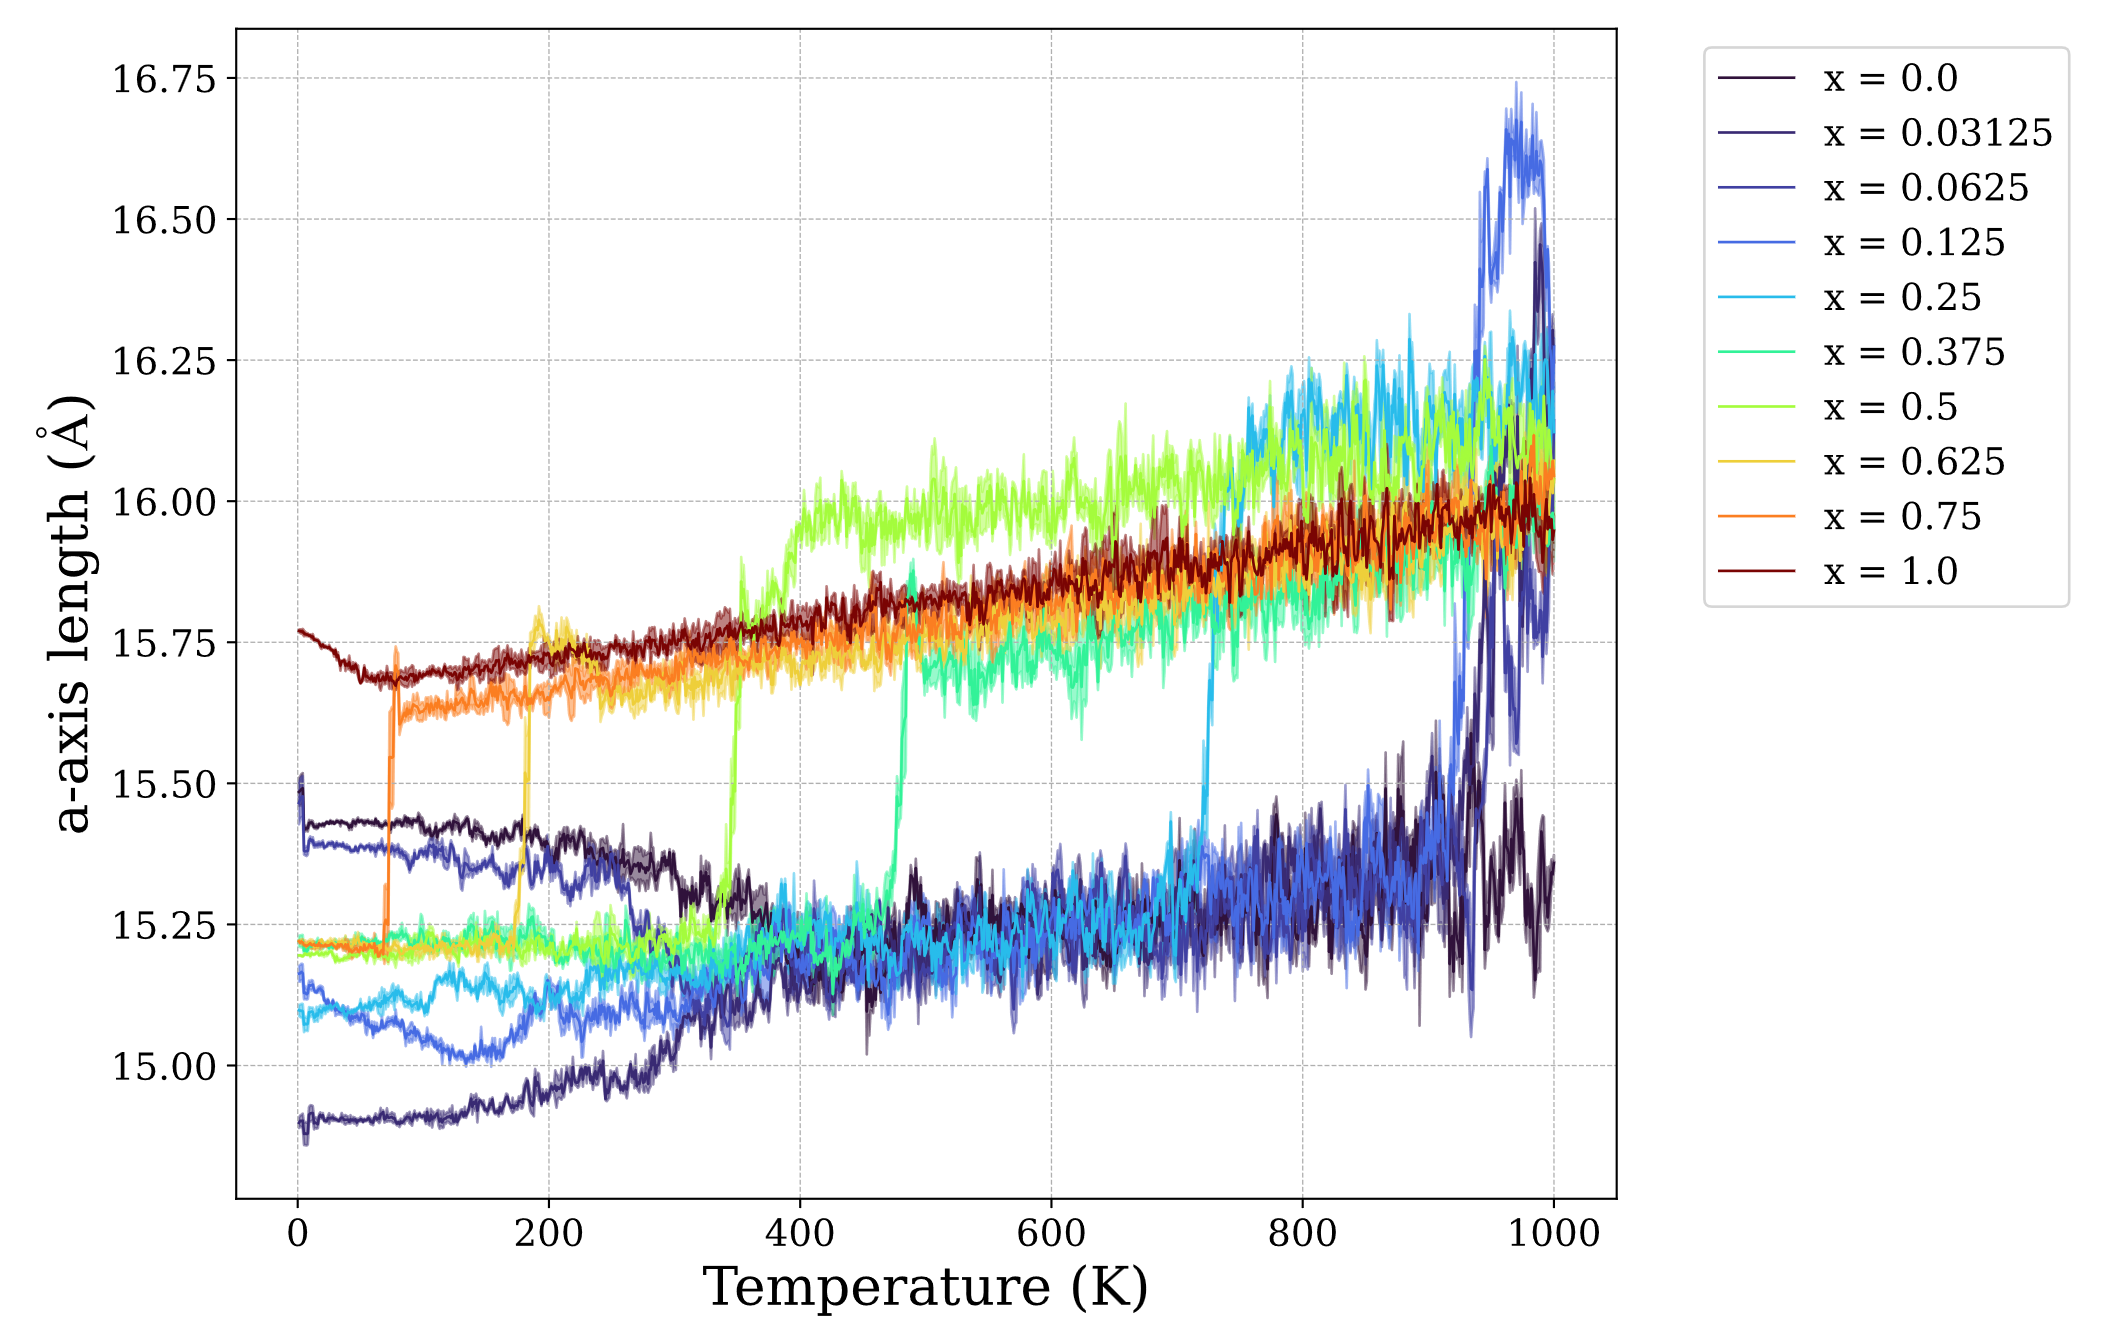


### Figure S1. Temperature dependence of the *a*-axis length of Bi1-xLaxCoO3 calculated by MLFF-MD.

###
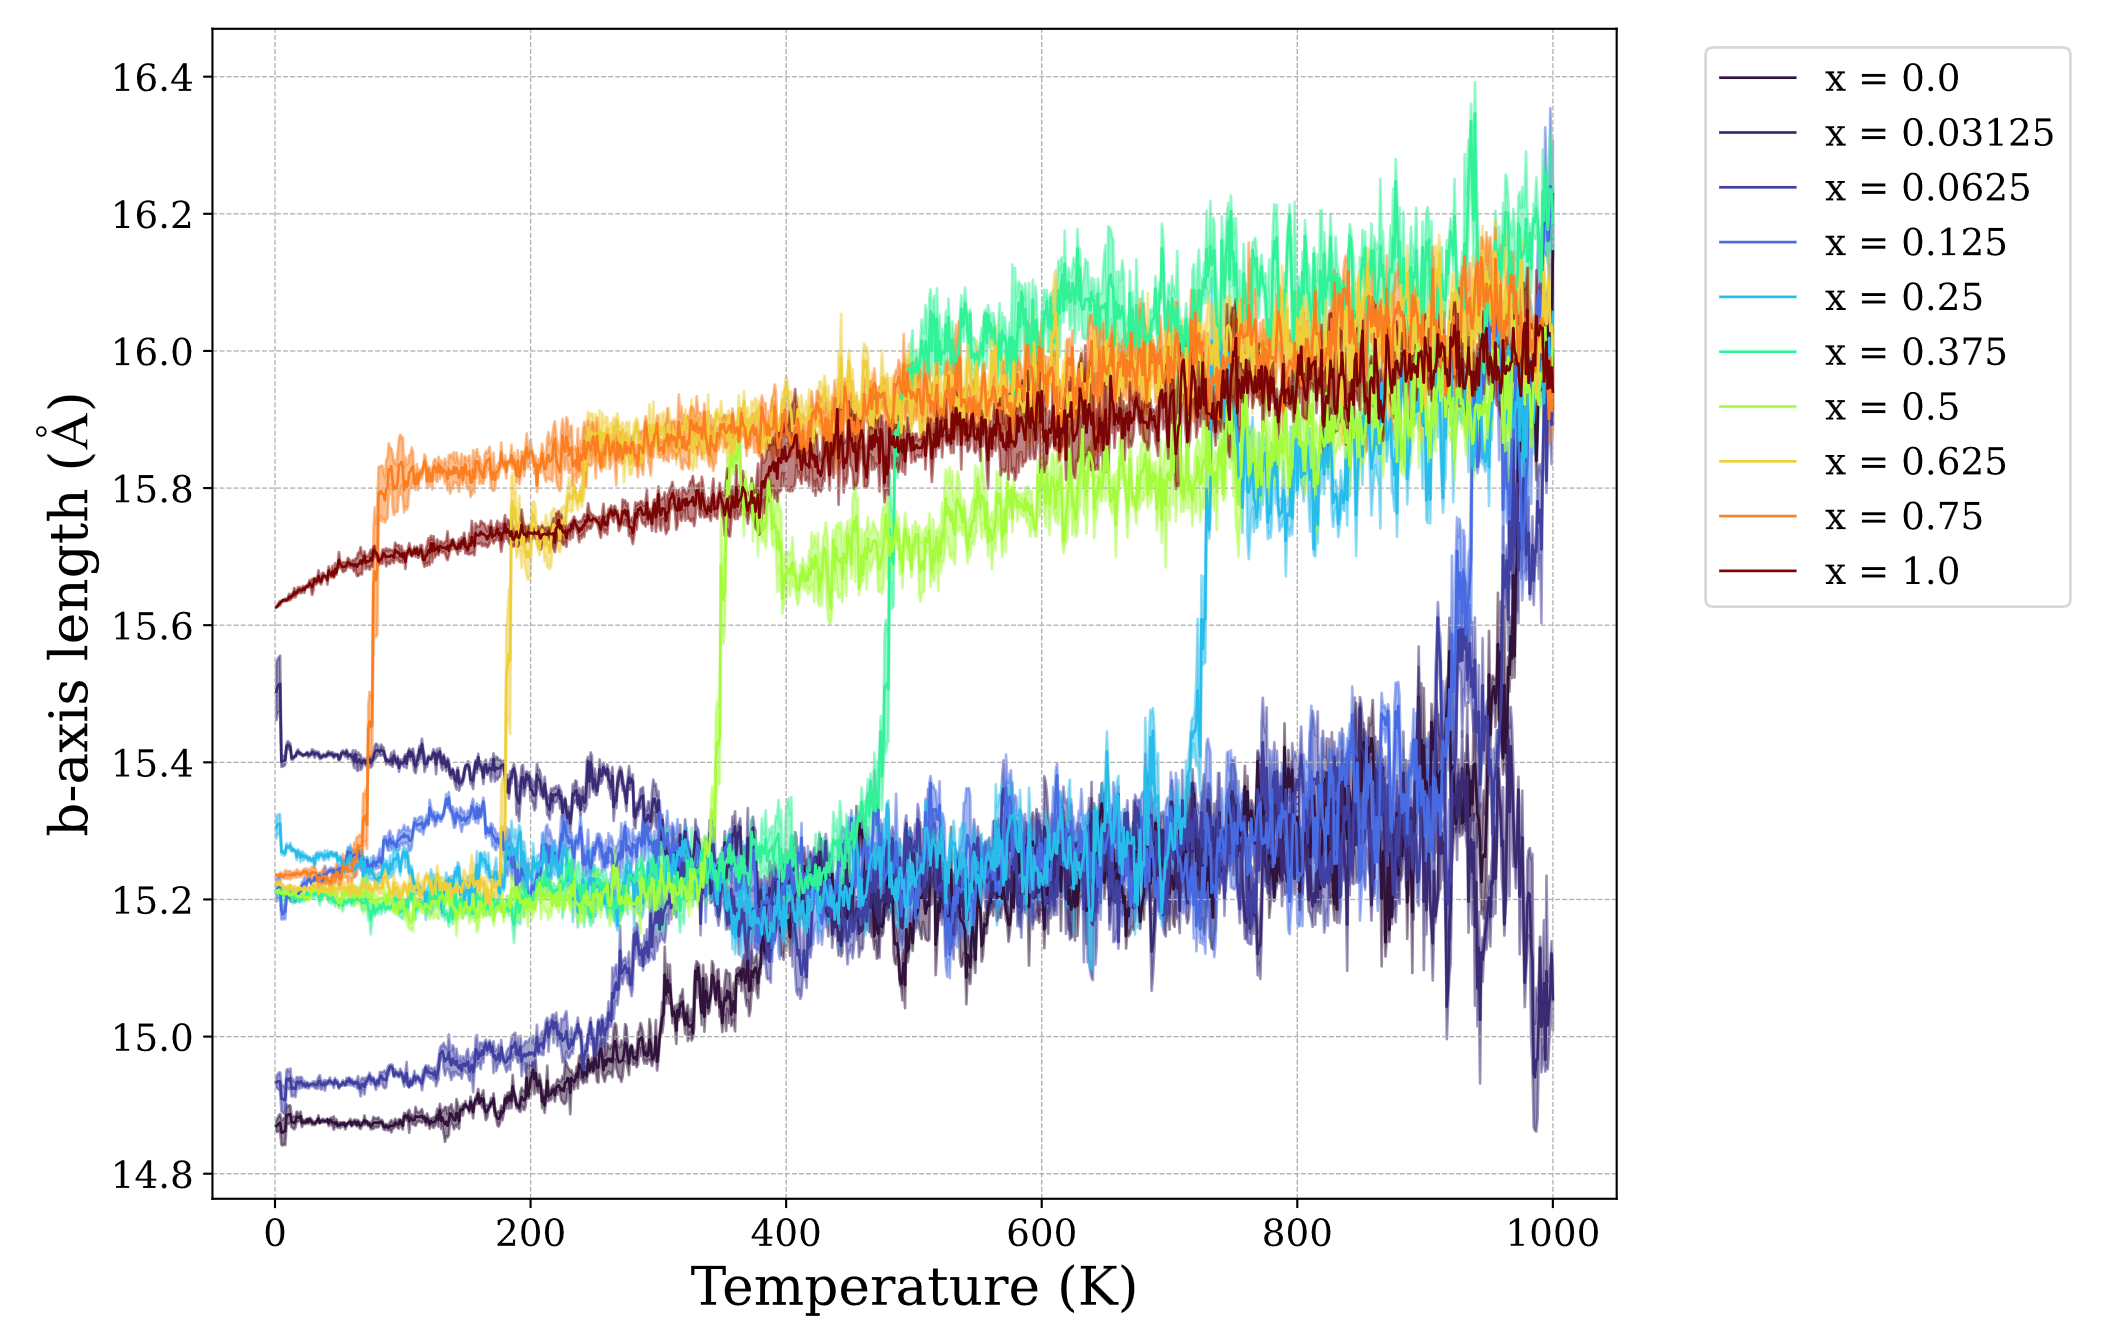


### Figure S2. Temperature dependence of the *b*-axis length of Bi1-xLaxCoO3 calculated by MLFF-MD.
